# Supplementary material for: Involvement of bacterial TonB-dependent signaling in the generation of an oligogalacturonide damage-associated molecular pattern from plant cell walls exposed to Xanthomonas campestris pv. campestris pectate lyases
Source: PubMed Central journal article supplement (PMC3551730; doi:10.1186/1471-2180-12-239), 2012-10-19
Supplement: 1471-2180-12-239-S5.pdf [file 1471-2180-12-239-S5.pdf]

**Additional table 2. Genes of pectin-degrading enzymes in *X. campestris* pv. *campestris* B100**

| <b>Locus_tag</b>                   | <b>Name<sup>1</sup></b> | <b>Gene Product</b>        | <b>EC-Number</b> | <b>CAZy<sup>2</sup></b> |
|------------------------------------|-------------------------|----------------------------|------------------|-------------------------|
| <i>Pectate lyase genes</i>         |                         |                            |                  |                         |
| xcc-b100_1345                      | <i>pel1</i>             | exported pectate lyase     | 4.2.2.2          | PL1                     |
| xcc-b100_3710                      | <i>pel2</i>             | exported pectate lyase     | 4.2.2.2          | PL1                     |
| xcc-b100_3711                      | <i>pel3</i>             | exported pectate lyase     | 4.2.2.2          | PL1                     |
| xcc-b100_0131                      | <i>pel4</i>             | truncated pectate lyase    | 4.2.2.2          | PL10                    |
| <i>Polygalacturonase genes</i>     |                         |                            |                  |                         |
| xcc-b100_0738                      | <i>pglA1</i>            | exported polygalacturonase | 3.2.1.15         | GH28                    |
| xcc-b100_1912                      | <i>pglA2</i>            | exported polygalacturonase | 3.2.1.15         | GH28                    |
| <i>Pectin methylesterase genes</i> |                         |                            |                  |                         |
| xcc-b100_0130                      | <i>pme1</i>             | exported pectinesterase    | 3.1.1.11         | CE8                     |
| xcc-b100_1913                      | <i>pme2</i>             | exported pectinesterase    | 3.1.1.11         | CE8                     |

<sup>1</sup>) Gene name.

<sup>2</sup>) Enzyme family in the CAZy database (<http://www.cazy.org/>) for polysaccharide lyases (PL), glycoside hydrolases (GH), or carbohydrate esterases (CE).
